# Supplementary material
Source: PubMed Central journal article supplement (PMC4590447)
Supplement: rspb20150425supp1.pdf [file rspb20150425supp1.pdf]

## Electronic Supplementary Material

### Hybridization masks speciation in the evolutionary history of the Galápagos marine iguana

Amy MacLeod, Ariel Rodríguez, Miguel Vences, Pablo Orozco-terWengel, Carolina García, Fritz Trillmich, Gabriele Gentile, Adalgisa Caccone, Galo Quezda, Sebastian Steinfartz

#### Extended methods

This section provides additional details on field and laboratory protocols as well as statistical analysis, complementing information in the main Methods section.

#### Field sampling

Marine iguanas from San Cristóbal were newly sampled in 2011-2014 at 17 sites (Table S1). We obtained blood samples from 460 marine iguanas from this island between 2011 and 2013, and used these in addition to samples collected for earlier studies from Punta Pitt (1993; n = 22) and Loberia (1993; n = 31). Animals were captured using poles fitted with a lasso loop. From each individual ca. 0.1 ml of blood was collected from the caudal vein, with the individual in dorsal recumbency. Venipuncture point was localized at one third of the distance between the cloacal opening and the tails' end, following the middle line. 24G (0.80 x 40 mm) needles were used for large males (>3kg body weight), 23G (0.60 x 25mm) needles for smaller adults, and 26G (0.45 x 25mm) for larger juveniles, while insulin needles were used for small juveniles. The needle was inserted with a 45°- 90° angle between the needle and the animal. Blood was stored in 75% ethanol or in a blood buffer (100 mM Tris, 100 mM EDTA, 2% SDS) and maintained at 4 – 7°C prior to extraction of genomic DNA.

#### Phylogenetic analysis and molecular dating: nuclear protein coding genes (dataset A)

To identify the closest relative of the Galápagos iguanas and date their origin on the archipelago, we selected four nuclear genes (RAG1, BDNF, R35 and NKTR) from a previous dataset [1] on the basis of their performance in reconstructing iguanid phylogeny. Sequences were newly determined for three marine iguanas, one land iguana (*Conolophus subcristatus*) and one individual each of *Cyclura cornata*, *Iguana iguana* and *Ctenosaura similis*, and combined with those of another 72 iguanians and other squamates from the dataset of Townsend et al. [1] to allow for the use of established time calibrations. DNA sequences were aligned taking into account their amino acid sequences, using the MAFFT [2] tool employed in Translator-X [3, 4]. Sequences were cleaned with GBlocks [5], using all three of the 'less-stringent' cleaning parameters available in Translator-X, resulting in a final sequence alignment of 3000 nucleotide positions which were used in analysis. Partitions and substitution models for analysis were identified using the Bayesian Information Criterion in Partition Finder [6], using the 'greedy search' scheme. The concatenated sequences were analysed using three approaches. (i) Partitioned Bayesian inference of phylogeny (BI) with MrBayes 3.2 [7], running two analyses of four chains for 20 million generations, sampling every 10,000 generation, and calculating a majority-rule consensus tree discarding the first 25% as burn-in. (ii) Simultaneous inference of phylogeny and divergence times was achieved using Beast 1.7.2 [8], with a set of 18 time constraints across squamates [1] and a Yule Speciation tree prior, running 200 million generations and calculating a maximum clade credibility tree with a burn-in of 25%. For this analysis we used an older Beast version (1.7.2) in order to strictly follow the previously published analysis [1] and to be able to use the same settings, with the goal of reaching fully comparable results. All Beast runs were given enough time to allow effective sample size values of all parameters to reach values well above 200.

(iii) Maximum parsimony bootstrapping was undertaken in Paup 4b2 [9], with 2000 heuristic search replicates under tree-bisection-reconnection, and with random addition sequence (10 replicates). Convergence of chains, mixing of parameters and appropriateness of burn-in settings of all Bayesian analyses was confirmed with AWTY [10].

#### Phylogenetic analysis and molecular dating: mitochondrial (mt) genes (dataset B)

On the basis of an earlier mitochondrial CR haplotype network [11] a representative selection of marine iguana samples were chosen from across the archipelago for analysis of mitochondrial phylogeny. Sampling was adjusted to represent the most divergent mtDNA phylogroups as well as the two San Cristóbal lineages (PP and LO). In total, up to 5557 bp were sequenced from seven mitochondrial genes (plus 3 adjacent tRNAs) in 20 *Amblyrhynchus*, six individuals of three species of *Conolophus* (including *C. marthae*), and one individual of *Ctenosaura similis*. Sequences of the *I. iguana* mt genome (GenBank accession number AJ278511) were used as outgroup. Sequences were edited using CodonCode Aligner (CodonCode Corporation) and aligned using Clustal W [12], as employed in MEGA (V6.0; [13]). Only single indels were present in the alignment (mainly in the outgroup) and all sites were therefore included in the analysis. Identification of partitions and substitution models, as well as phylogenetic analysis was undertaken as in dataset A, except for the “timetree” analysis with Beast. Here, we specified a coalescent uniform tree prior, a secondary time constraint with an uniform prior (2.76-6.67 mya) for the *Amblyrhynchus-Conolophus* split based on the estimate for this split obtained from analysis of dataset A (credibility intervals), and modified substitution rate priors to allow variation over a wide range. Posterior values did not stabilize with site models suggested by Partition Finder, probably due to overparametrization, and we therefore specified a simple HKY model for all partitions. Analyses with alternative priors and models (different coalescent or speciation tree priors; more complex substitution models; no phylogenetic constraints) were, however, congruent in divergence time estimates, in all cases recovering an age of basal *Amblyrhynchus* splits <0.3 mya.

#### Phylogenetic analysis and molecular dating: DNA sequences from RADSeq (dataset G)

See main Methods section for details of RADSeq analysis and inference of phylogeny based on SNP data. For molecular dating of splits within *Amblyrhynchus* we used a 4-taxon subset of dataset F (Table S2), containing one land iguana outgroup (Santa Fe, sample LSF06) and three marine iguana specimens (Santa Fe, FES01; San Cristóbal, SRIL10 and SRS19), representing one of the deepest split within marine iguanas and the PP/LO split. We excluded in Paup all sites with missing or ambiguous data in one or several taxa, resulting in a final matrix of 1,793,845 sites, of which 33,452 were variable, and only 330 were variable among the three marine iguanas. The dataset was analysed in Beast 2.0 under a coalescent tree prior (constant growth), time-calibrating the root MRCA according to analysis of dataset A at 4.6 mya (normal prior, standard deviation 0.3). We used a GTR substitution model selected by the Akaike Information Criterion (AIC) in MrModeltest [14]. We ran 2 billion generations, sampled every 100,000th generation, discarded the first 50% trees as burn-in after examination of parameters in Tracer, and ascertained that all ESS values were >200. Alternative explorative runs with the HKY model (selected by AIC for the dataset of three marine iguana samples only) did not result in relevant differences in time estimates.

#### Mitochondrial differentiation of marine iguanas (dataset C)

An alignment of the complete mitochondrial control region (CR) sequences, 1181 bp in length, was used to analyse archipelago-wide mitochondrial phylogeography of marine iguanas, and mitochondrial differentiation among PP and LO lineages. This gene segment

was newly sequenced from 310 individuals of marine iguanas from San Cristóbal and 34 so far unused samples from Darwin, Wolf, Rocca Redonda and Seymour Norte islands, using methods from a previous study [11], and leading to a final dataset of 1491 sequences. One individual from each of the three species of Galápagos land iguana were also sequenced as outgroups. Sequences were edited and aligned as described above for dataset B.

We visualized CR variation in haplotype networks reconstructed using information from phylogenetic trees as implemented in Haploviewer [15]. Maximum likelihood trees were estimated with PHYML [16] using the best-fitting substitution model (GTR +I +G) as identified by the Akaike information criterion [17] in J-Modeltest [18].

#### Microsatellite loci genotyping (datasets D and E)

As a basis for the archipelago-wide comparison of population structure (dataset D) we used microsatellite loci which had largely been determined in previous studies [11, 19], in this study, 12 loci were used due to omission of locus E17 which had a high failure rate. This available dataset was extended with some newly genotyped samples from other islands, collected during previous fieldwork, and with all newly collected San Cristóbal samples. DNA from previously genotyped samples were genotyped along with the newly obtained samples, in order to calibrate alleles between different sequencing machines and to ensure that alleles were correctly scored. This resulted in an available pool of almost 1500 samples that were all genotyped at 12 loci. All San Cristóbal samples (dataset E; Table S1, S2) were genotyped for the same 12 loci as the archipelago-wide dataset, plus an additional 6 loci, yielding data for 18 microsatellite loci described previously [20] excluding locus E17. Primers, multiplexes, and PCR parameters are detailed elsewhere [20]. Scoring of alleles was performed with Genemarker (version 1.95; Applied Biosystems).

#### Population structure analysis (datasets D and E)

A model-based Bayesian clustering method (Structure, v. 2.3.3; [21]) was used to infer population structure from microsatellite loci data. As this method requires no *a priori* sampling information, it is particularly useful for revealing cryptic population structure. For within-island analysis on San Cristóbal (dataset E), prior number of inferred populations (K) ranged from 1-5, and for analysis of samples across the archipelago (dataset D), K ranged from 1-20; both with 10 iterations for each K. Each run used 100,000 MCMC replicates following a burn-in period of one million replicates. An admixture model was employed, and the model parameter ‘alpha’ was inferred from the data in combination with correlated allele frequencies. Inferred number of populations was obtained [22] via the Structure Harvester application [23]. Results were permuted using CLUMPP [24] and visualized using Distruct [25].

#### Population structure analysis: sample selection for dataset D

Variation in animal density and sampling effort across the archipelago (dataset D; 12 microsatellite loci) mean that within this dataset, certain populations were strongly overrepresented with respect to others. Since this can lead to artefacts within population structure analysis [26, 27], prior to analysis, the sample sizes for each island were standardized to closely match the smallest sample size available for any island (around 50; Table S2). Any islands where sample size was well below 20 were not considered in this analysis. However, this applied only to very small islands (e.g. Rabida); located nearby larger (included) islands and were not found to be harbouring genetically distinct clusters in earlier studies [11, 19]. This standardization procedure was done by pooling samples from all sampling locations and occasions on each island, and randomly selecting 50 individuals, except in the cases of Santiago and Floreana islands where all available samples (47 and 43

respectively) were used. Data from San Cristóbal Island were treated slightly differently, because of the two strongly divergent populations identified previously [11, 19]. Here, 2 sets of  $n=50$  were created, representing the PP and LO lineages, in addition to a third set collected from a previously non-sampled area of the island, where the genetic identity of individuals was unknown. In total, 614 individuals from all islands were included in this analysis (dataset E).

#### Population structure analysis: sample selection for dataset E

For analysis within San Cristóbal (dataset E; 18 microsatellite loci) our goal was to assign populations and specimens to the two lineages (LO and PP), and to identify possible hybrids among these two lineages. Therefore, in this analysis, we excluded all individuals that were identified as migrants or possible hybrids with other islands in the previous Structure analysis (dataset D) or assignment tests (see text section below). Additionally, any individuals demonstrating a mitochondrial haplotype private to other islands were removed for the same reason. Further, to exclude artefacts arising from missing data, individuals with missing data for more than one allele were excluded; this necessitated only a small reduction in sample size. Additionally, any resampled individuals were identified using Genalex [28] and removed. In total, 454 individuals were included in the San Cristóbal within-island dataset.

#### Detection of hybridization on San Cristóbal: datasets C, D and E

Hybrids or migrants from other islands on San Cristóbal were initially identified from the Structure analysis of dataset D as individuals who demonstrated a lower probability of belonging to either LO or PP than a predefined threshold (80%). Furthermore, several individuals had mitochondrial haplotypes (dataset C) predominantly found on other islands. All of these individuals were submitted to assignment tests [29] based on their microsatellite loci genotypes, using GENECLASS [30]. This method was chosen as it produced results, which were in close agreement to the islands associated with mitochondrial haplotypes. We considered as hybrids or migrants from other islands all individuals that did not assign with a probability of  $>90\%$  [31] to either of the two San Cristóbal populations, and/or if they had a mitochondrial haplotype private to another island. For the assignment tests, a 12-loci reference dataset was created to include LO ( $N=151$ ) and PP ( $N=286$ ), and any other cluster where San Cristóbal individuals had been assigned to in the earlier analysis with Structure (dataset D): Española/Floreana ( $N=128$ ) and Santa Cruz ( $N=116$ ).

#### Isolation by distance (IBD) analysis (dataset E)

To test the extent to which isolation by distance (IBD) shaped the genetic diversification on each of the two San Cristóbal clusters, we estimated the geographic isolation among localities measuring in GoogleEarth™, the pairwise coastline distances (in km) between marine iguana populations of LO (5 localities) and PP (8 localities). The genetic differentiation between localities was estimated using pairwise  $R_{ST}$  values, an analogue of  $F_{ST}$  specifically developed for microsatellite loci [32]. For these calculations we considered a sampling locality to be a place where more than two individuals have been genotyped. Suspected hybrids and migrants (see previous section) were not included in the dataset. We evaluated the association between the two distance matrices with a Mantel test, as implemented in the R package *vegan* [33], evaluating statistical significance with 10000 permutations.

#### Demographic history of PP and LO on San Cristóbal (dataset E)

Two approaches were used to examine the demographic history of the LO and PP lineages based on 18 microsatellite loci data (dataset E). Firstly, the software Bottleneck [34] was used to determine the presence of heterozygote excess in each of the populations using the standardized difference test and the Wilcoxon-ranked test. We carried out 1,000 simulations

to assess the tests' significance under the two phased mutation model, assuming 30% of the mutations were multistep with a variance in mutation size of 30. Secondly, the software MsVar 1.3 [35] was used to characterize the recent demographic history of the LO and PP lineages. The method implemented in MsVar uses coalescent simulations to estimate the current effective population size ( $N_0$ ), the ancestral population size ( $N_t$ ) and the time at which a demographic change ( $t$ ) may have occurred (i.e. an expansion after a bottleneck) following an exponential model of effective population size. The simulations carried out in MsVar were conditioned with various *a priori* combinations for the model parameters, so that stable scenarios, bottlenecks and expansion were considered, as well as variation in the mutation rate across microsatellite loci (Table S5). Each MsVar run consisted of 1,010 iterations of the MCMC algorithm, discarding the initial 20% of the coalescent simulations as burn-in. Convergence of the chains was assessed with Gelman & Rubi's diagnostic [36] calculated on the basis of the seven runs performed each for the PP and LO population with different priors. Gelman and Rubin's diagnostic was carried out using the CODA library [37]. We further tested whether the LO and PP lineages have evolved under a model with or without gene flow, using simulations performed using the software 2mod [38]. We performed three independent replicates with a total of 1,000,000 coalescent simulations, each using the MCMC algorithm implemented in 2mod. For each simulation, the likelihood of the drift or migration model is estimated on the basis of the allele counts in the data. After discarding the first 20% of the simulations as burn-in of the MCMC, we estimated the posterior probability of each model as the proportion of simulations that supported each scenario (i.e. drift or migration).

#### Morphological characterization of PP and LO

To analyse whether specimens of the two San Cristóbal lineages, PP and LO, are also morphologically differentiated, we scored morphometric variables and scale counts from 139 *Amblyrhynchus* specimens collected from San Cristóbal. These individuals were also genotyped at 18 microsatellite loci, and all specimens identified as hybrids or migrants from other islands were disregarded. Specimens were assigned to four different age classes (1: juveniles below 1 year of age; 2: larger juveniles estimated between 1 and 2-3 years; 3: sub-adults approaching adult size but lacking well developed adult morphology, and 4: adults of breeding age based on body size and development of external features such as elevated tubercular scales positioned dorsally on head, femoral pores, and dorsal crests. We sexed only specimens in age class 4, and considered specimens with obvious male characteristics such as enlarged dorsal crests, comparatively larger body size, and well-developed femoral pores as males, and those lacking these features as females. Measurements taken from living specimens in the field include snout-vent length (SVL) from snout tip to cloaca and total length (TL) from snout tip to tail tip to the nearest 10 mm, head width (HW; taken at point of maximum width of head), head length (HL) taken from the snout tip to the edge of the furthest elevated tubercular scale dorsally on head, maximum head height (HH), and length of the 4th toe, taken with a calliper to the nearest 0.1 mm, and weight (to the nearest 0.01 kg). Scale counts were taken from detailed photographs of each of the specimens.

In an initial search for potentially diagnostic differences, we took the following scale counts from 20 specimens of each genetic lineage: lamellae under the third and fourth toe on hindlimb (LAM3T, LAM4T), supralabials (SUPL), series of scales above supralabials (suprasupralabials, SUPSUPL), infralabials (INFL), series of scales below infralabials (infrainfralabials, INFINFL), minimum transversal count of large scales dorsally on head (TRHSC), minimum longitudinal count of large scales dorsally on head (LOHSC), innermost series of scales on upper and lower eyelid (EYELUI, EYELLI), second series of scales on upper and lower eyelid (EYELUO, EYLLO), femoral pores (males only; FP), number of

scales between large dorsal head scales and start of dorsal crest spines (HCSP), number of dorsal crest spines in anteriormost part of dorsal crest (DORSC1). All bilateral counts (LAM3T, LAM4T, SUPL, SUPSUPL, INFL, INFINFL, EYELUI, EYELLI, EYELUO, EYELLO) were done on both sides of the body whenever possible, the average between both values was calculated per specimen and used for further analysis. In cases where reliable counts could only be obtained from either the left or right side of the body, the respective value was used for analysis. In numerous cases, reliable counts could not be obtained due to injuries of the specimens (e.g. partly mutilated toes), scales being difficult to distinguish due to skin shedding, or poor quality of photographs. In all such cases, counts were disregarded. Our goal here is not to provide a full morphometric analysis of variation in these lizards, but to instead highlight morphological differentiation among the lineages. We therefore limited detailed comparisons to a set of variables in which such differentiation was clearly apparent. We compared the values of the initially analysed 40 specimens with non-parametrical Mann-Whitney U-tests for pairwise comparisons. Based on this initial evaluation, we identified the variables SVL, HL, LAM3T, LAM4T, SUPL, SUPSUPL, INFL, INFINFL, and HCSP as most clearly differentiated between the two genetically differentiated lineages, and therefore assessed these variables in the total number of 139 individuals. We used U-tests for final comparisons with the maximum number of available data for each variable. We further performed multivariate analyses of variance (ANOVAs) with Tukey's post-hoc tests for single variables. All statistical tests were done in Statistica 7.1 (StatSoft Inc.). As ANOVAs cannot deal with missing data, these analyses included a reduced number of specimens (i.e. those with complete sets of data for the variables compared). Morphometric measurements were size-corrected by linear regression against SVL, and the residuals used for further analysis.

## Extended Results and Discussion

This section provides additional details on the results, as well as statistical analysis and discussion, complementing information in the main Results and Discussion parts of the paper.

### Data Sharing

Single genes from datasets A, B and C are deposited in Genbank ([www.ncbi.nlm.nih.gov/genbank/](http://www.ncbi.nlm.nih.gov/genbank/)) under the following accession numbers: NKTR: KR350691 - KR350697, R35: KR350698 - KR350704, RAG1: KR350705 - KR350711, BDNF: KR350712 - KR350718, ND4: KR350719 - KR350742, ND2: KR350743 - KR350767, Cytochrome-B: KR350768 - KR350787, COI: KR350788 - KR350813, 12S: KR350814 - KR350838, 16S: KR350839 - KR350861, and control region: KR350862 - KR351205. Other data are deposited in Dryad ([datadryad.org](http://datadryad.org)) under doi:10.5061/dryad.pp6bm. Brief information about the files is given here, with Dryad file names shown in bold. Aligned and concatenated nuclear sequences (including tRNA sequences not deposited in Genbank) were deposited as **dataset\_A**, aligned mitochondrial genes are found in **Dataset\_B\_Mitochondrial**, and complete aligned mitochondrial control region sequences are provided in **Dataset\_C**. Microsatellite genotypes representing marine iguanas from across the archipelago are provided in **Dataset\_D\_Microsats**, genotypes from San Cristobal *only* are given in **Dataset\_E\_Microsat** and a subset of these samples used in MsVar and Bottleneck analysis are given in **Dataset\_E\_Microsat**. Data from RAD sequencing are given in **Datasets\_F\_G\_H** with further notes in the **README.doc**. Morphometrics used in comparison between two populations of marine iguanas are given in the file: **Morphometry\_Amblyrhynchus**.

### Divergence time estimates

Our timetree, based on four nuclear genes (dataset A; Fig. S1), predicted a younger age for the split between Galápagos marine and land iguanas than a previous study had [39]. As such, our study reconciles the age of this endemic clade with the age of the currently extant islands. We consider our timetree to be more reliable than the one of the previous study, which was undertaken at a time when sophisticated molecular dating methods were not yet available, and is based only on mitochondrial genes, which are prone to overestimating divergence times [40]. Furthermore, this estimate was based on a possibly inadequate strict clock approach, with a relatively fast substitution rate (2% per my for the mitochondrial cytochrome b gene) which was derived from data on mammals. Conversely, our estimates are based on single-copy protein-coding nuclear genes, using multiple squamate calibrations, and relaxed clock models, which together are known to provide more realistic divergence time estimates.

### Demographic history of LO and PP

The two approaches (i.e. bottleneck and MsVar) to examine the demographic history of LO and PP detected bottlenecks in the recent history of these lineages (Fig. S3). Both, the standardized difference test and the Wilcoxon-ranked test identified a significant excess in heterozygosity, consistent with the hypothesis of a recent bottleneck in the past history of PP and LO (Table S4). The MsVar approach identified that the bottleneck experienced by both lineages took place approximately 1,800-3,000 years ago and consisted of a reduction in the effective population size of ~100,000 individuals to ~1,000 individuals (see Table S6 for exact data and corresponding confidence intervals).

The demographic analysis with 2mod aiming at determining whether the LO and PP lineages evolved under a simple model of drift versus a model that included migration between populations found consistently across replicates of the analysis that the gene flow model was supported with a posterior probability of ~1.

### Morphological analysis

As our dataset contains a large number of missing data and furthermore differences in body size imply the need for in-depth analysis of possible allometric effects, a simultaneous analysis of all data in a single multivariate model would either result in very low sample sizes (if full variable coverage was needed for each individual) or potential artefacts (if missing data were replaced by mean values). We therefore opted for a mixed strategy, first analysing pholidotic characters along with body size (SVL), and second, analysing the morphometric measurements. Rather than adopting a strict Bonferroni correction for multiple testing, we considered results as robust if they were consistently suggested by separate analyses, i.e. of independent datasets (males *versus* females) or of subsets of data (i.e. after excluding large and small specimens which might be overrepresented in either cluster).

(i) Body size. Both non-parametric Mann-Whitney U-tests (Tables: S9, S11 & S13; Fig. S7) and ANOVA coupled with Tukey's post-hoc tests (Tables: S10, S12 & S14) suggested statistically significant differences in body size between LO and PP, with PP specimens being smaller. This result remained significant in separate analyses of adult male and female specimens, despite wide overlap in sizes between the two clusters. Although p-values in U-tests would be insufficient under Bonferroni correction, the fact that statistical significance is maintained in the ANOVA post-hoc tests increases our confidence in the biological meaning of this pattern.

(ii) Pholidotic characters. Univariate pairwise U-tests flagged a large numbers of variables as statistically different between the two clusters (Tables: S9-S14; Fig. S7), but in many cases (LAM3T, LAM4T, SUPSUPL, EYELUO) the significance values were between 0.01-0.05,

and would not remain significant following Bonferroni correction for multiple testing. However, three variables remained significantly different after Bonferroni correction, remained so in Tukey's post-hoc tests, and showed similar trends in males and females. These were: INFL, INFINFL, and DORSC1. We therefore conclude that there is robust evidence for PP specimens having on average a larger numbers of infralabials, infra-infralabials, and spines in first part of dorsal crest than specimens of the LO cluster.

(iii) Morphometric characters. Morphometric measurements are as a rule strongly size-dependent, and this relationship is often near-linear in adult animals. However, many body proportions are subject to non-linear allometric growth in the transition from juveniles to adults. For instance in lizards, young specimens have proportionally larger heads, and may also have proportionally longer limbs than adults. In the case of marine iguanas, LO specimens grow to larger sizes than PP specimens. If growth of head and limbs would still be slightly allometric in the subadult or young adult stage, then between-cluster differences in related measurements could potentially be caused by their different body sizes. An initial comparison of all adult specimens (males and females) revealed statistically significant differences in HW, HL and TOEL residuals between the two clusters. Considering separate tests of males and females, and tests excluding small specimens (<20 cm SVL) as well as large specimens (>36 cm SVL), only the between-cluster differences in HL residuals were consistently retrieved, and as such, can be considered robust (Tables S15-S18). Therefore, we conclude that PP specimens have proportionally longer heads than LO specimens.

#### Hybridization

Given the large number of highly polymorphic loci used and the strong level of differentiation between clusters, it is likely that the analysis would have adequately identified hybrids [30]. Although results from New Hybrids did not unambiguously assign hybrid individuals to hybrid classes (e.g. F1, F2 etc.; data not shown), the disparate results between D-loop haplotypes and microsatellite loci clusters indicate that extensive backcrossing has occurred. For instance, several individuals demonstrated high assignment probabilities for being PP individuals based on microsatellite loci, whilst harbouring a D-loop haplotype private to the Espanola/Floreana cluster (Table S3; Fig. S2). This indicates that the hybridization event occurred several generations ago, but since then, most of the genetic signature indicative for Espanola/Floreana cluster in the microsatellite loci has been lost.

#### Isolation by distance (IBD) analysis

Genetic differentiation scales with distance between subpopulations within the Loberia population but not within the Punta Pitt population, indicating a more recent expansion within the PP lineage (Fig. S4). Within both clusters, observed maximum geographically separated subpopulations display a lower genetic distance than geographically closest subpopulations of different clusters (Tables: S7 & S8), but in the PP cluster no significant IBD is seen, suggesting that gene flow is maintained over the maximum coastal distance of 30 km.

#### **Supplementary Material References**

1. Townsend TM, Mulcahy DG, Noonan BP, Sites JW, Kuczynski CA, Wiens JJ, Reeder TW. 2011 Phylogeny of iguanian lizards inferred from 29 nuclear loci, and a comparison of concatenated and species-tree approaches for an ancient, rapid radiation. *Mol. Phylogenet. Evol.* **61**, 363–80. (doi:10.1016/j.ympev.2011.07.008)



2. Katoh K, Kuma K, Toh H, Miyata T. 2005 MAFFT version 5: improvement in accuracy of multiple sequence alignment. *Nucleic Acids Res* **33**, 511–518. (doi: 10.1093/nar/gki198)
3. Abascal F, Zardoya R, Telford MJ. 2010 TranslatorX: multiple alignment of nucleotide sequences guided by amino acid translations. *Nucleic Acids Res.* **38**, W7. (doi: 10.1093/nar/gkq291)
4. Dessimoz C, Gil M. 2010 Phylogenetic assessment of alignments reveals neglected tree signal in gaps. *Genome Biol.* **11**, R37. (doi: 10.1186/gb-2010-11-4-r37)
5. Castresana J. 2000 Selection of conserved blocks from multiple alignments for their use in phylogenetic analysis. *Mol. Biol. Evol.* **17**, 540–552.
6. Lanfear R, Calcott B, Ho SY, Guindon S. 2012 PartitionFinder: combined selection of partitioning schemes and substitution models for phylogenetic analyses. *Mol. Biol. Evol.* **29**, 1695–1701. (doi: 10.1093/molbev/mss020)
7. Ronquist F, Teslenko M, van der Mark P, Ayres DL, Darling A, Höhna S, Larget B, Liu L, Suchard MA, Huelsenbeck JP. 2012 MrBayes 3.2: efficient Bayesian phylogenetic inference and model choice across a large model space. *Syst. Biol.* **61**, 539–542. (doi:10.1093/sysbio/sys029)
8. Drummond, A.J., Suchard, M.A., Xie, D. & Rambaut, A. 2012 Bayesian Phylogenetics with BEAUti and the BEAST 1.7. *Mol. Biol. Evol.* **29**, 1969-1973. (doi:10.1093/molbev/mss075)
9. Swofford D. 2003 PAUP\* Phylogenetic analysis using parsimony (\*and other methods). version 4.0 b10, Sunderland, Massachusetts, Sinauer Associates
10. Nylander JA, Wilgenbusch JC, Warren DL, Swofford DL. 2008 AWTY (are we there yet?): a system for graphical exploration of MCMC convergence in Bayesian phylogenetics. *Bioinformatics* **24** 581–583. (doi:10.1093/bioinformatics/btm388)
11. Steinfartz S, Glaberman S, Lanterbecq D, Russello MA, Rosa S, Hanley TC, Marquez, C, Snell HL, Snell HM, Gentile G *et al.* 2009 Progressive colonization and restricted gene flow shape island-dependent population structure in Galápagos marine iguanas (*Amblyrhynchus cristatus*). *BMC Evol. Biol.* **9**, 297. (doi:10.1186/1471-2148-9-297)
12. Larkin MA, Blackshields G, Brown NP, Chenna R, McGettigan, PA, McWilliam H, Valentin F, Wallace IM, Wilm A, Lopez R *et al.* 2007 Clustal W and Clustal X version 2.0. *Bioinformatics* **23**, 2947–2948. (doi: 10.1093/bioinformatics/btm404)
13. Tamura K, Stecher G, Peterson D, Filipski A, Kumar S. 2013 MEGA6: molecular evolutionary genetics analysis version 6.0. *Mol. Biol. Evol.* **30**, 2725–2729. (doi:10.1093/molbev/mst197)
14. Nylander J. 2004 MrModeltest v2. Program distributed by the author. *Evolutionary Biology Centre, Uppsala University* 2.
15. Salzburger W, Ewing GB, Von Haeseler A. 2011 The performance of phylogenetic algorithms in estimating haplotype genealogies with migration. *Mol. Ecol.* **20**, 1952–1963. (doi:10.1111/j.1365-294X.2011.05066.x)
16. Guindon S, Gascuel O. 2003 A simple, fast, and accurate algorithm to estimate large phylogenies by maximum likelihood. *Syst. Biol.* **52**, 696–704. (doi:10.1080/10635150390235520)

17. Akaike H. 1974 A new look at the statistical model identification. *IEEE Trans. Automat. Contr.* **19**, 716–723. (doi: 10.1109/TAC.1974.1100705)
18. Posada D. 2008 jModelTest: phylogenetic model averaging. *Mol. Biol. Evol.* **25**, 1253–1256. (doi:10.1093/molbev/msn083)
19. Rassmann K, Tautz D, Trillmich F, Gliddon C. 1997 The microevolution of the Galápagos marine iguana *Amblyrhynchus cristatus* assessed by nuclear and mitochondrial genetic analyses. *Mol. Ecol.* **6**, 437–452. (doi:10.1046/j.1365-294X.1997.00209.x)
20. MacLeod A, Koch V, Garcia-Parra C, Trillmich F, Steinfartz S. 2012 New highly polymorphic microsatellite loci for the Galápagos marine iguana, *Amblyrhynchus cristatus*. *Amphib-reptil.* **33**, 533–536. (doi:10.1163/15685381-00002854)
21. Pritchard JK, Stephens M, Donnelly P. 2000 Inference of population structure using multilocus genotype data. *Genetics* **155**, 945–959.
22. Evanno G, Regnaut S, Goudet J. 2005 Detecting the number of clusters of individuals using the software STRUCTURE: a simulation study. *Mol. Ecol.* **14**, 2611–2620. (doi:10.1111/j.1365-294X.2005.02553.x)
23. Earl DA, vonHoldt BM. 2012 STRUCTURE HARVESTER: a website and program for visualizing STRUCTURE output and implementing the Evanno method. *Conserv. Genet. Resour.* **4**, 359–361. (doi:10.1007/s12686-011-9548-7)
24. Jakobsson M, Rosenberg NA. 2007 CLUMPP: a cluster matching and permutation program for dealing with label switching and multimodality in analysis of population structure. *Bioinformatics* **23**, 1801–1806. (doi:10.1093/bioinformatics/btm233)
25. Rosenberg NA. 2004 DISTRUCT: a program for the graphical display of population structure. *Mol. Ecol. Notes.* **4**, 137–138. (doi:10.1046/j.1471-8286.2003.00566.x)
26. Chikhi L, Sousa VC, Luisi P, Goossens B, Beaumont MA. 2010 The confounding effects of population structure, genetic diversity and the sampling scheme on the detection and quantification of population size changes. *Genetics* **186**, 983–995. (doi:10.1534/genetics.110.118661)
27. Shringarpure S, Xing EP. 2014 Effects of sample selection bias on the accuracy of population structure and ancestry inference. *G3 (Bethesda)* **4**, 901–911. (doi:10.1534/g3.113.007633)
28. Peakall ROD, Smouse PE. 2006 GENALEX 6: genetic analysis in Excel. Population genetic software for teaching and research. *Mol. Ecol.notes* **6**, 288–295.
29. Baudouin L, Lebrun P. 2001 An operational Bayesian approach for the identification of sexually reproduced cross-fertilized populations using molecular markers. *Acta Hort.* **546**, 81–94.
30. Piry S, Alapetite A, Cornuet JM, Paetkau D, Baudouin L, Estoup A. 2004 GENECLASS2: a software for genetic assignment and first-generation migrant detection. *J. Hered.* **95**, 536–539. (doi:10.1093/jhered/esh074)
31. Burgarella C, Lorenzo Z, Jabbour-Zahab R, Lumaret R, Guichoux E, Petit RJ, Soto A, Gil L. 2009 Detection of hybrids in nature: application to oaks *Quercus suber* and *Q. ilex*. *Heredity* **102**, 442–452. (doi:10.1038/hdy.2009.8)
32. Slatkin M. 1995 A measure of population subdivision based on microsatellite allele frequencies. *Genetics* **139**, 457–462.

33. Oksanen J, Roeland K, Legendre P, O'Hara B, Stevens MH, & Wagner H. 2013 vegan: community ecology package. R package (Vienna, Austria, <http://cran.r-project.org>).
34. Piry S, Luikart G, Cornuet JM. 1999 Computer note. BOTTLENECK: a computer program for detecting recent reductions in the effective size using allele frequency data. *J. Hered.* **90**, 502–503. (doi:10.1093/jhered/90.4.502)
35. Beaumont MA. 1999 Detecting population expansion and decline using microsatellites. *Genetics* **153**, 2013–2029.
36. Brooks SP, Gelman A. 1998 General methods for monitoring convergence of iterative simulations. *J. Comp. Graph. Stat.* **7**, 434–455. (doi:10.1080/10618600.1998.10474787)
37. Plummer M, Best N, Cowles K, Vines K. 2006 CODA: Convergence diagnosis and output analysis for MCMC. *R news* **6**, 7–11.
38. Ciofi C, Beaumontf MA, Swingland IR, Bruford MW. 1999 Genetic divergence and units for conservation in the Komodo dragon *Varanus komodoensis*. *Proc. Roy. Soc. B* **266**, 2269–2274. (doi:10.1098/rspb.1999.0918)
39. Rassmann K. 1997 Evolutionary age of the Galápagos iguanas predates the age of the present Galápagos Islands. *Mol. Phylogenet. Evol.* **7**, 158–172. (doi:10.1006/mpev.1996.0386)
40. Near TJ, Eytan RI, Dornburg A, Kuhn KL, Moore JA, Davis MP, Wainwright PC, Friedman M, Smith WL. 2012 Resolution of ray-finned fish phylogeny and timing of diversification. *Proc. Natl. Acad. Sci.* **109**, 13698–13703. (doi:10.1073/pnas.1206625109)

**Table S1.** Locations of sampling and number of marine iguana blood samples collected from San Cristóbal Island. Asterisk denotes samples collected by K. Rassmann, all others collected by the authors.

| Name                      | Code  | Latitude     | Longitude     | Number of blood samples per year |      |      |      |      |      | Data available per location |         |                             |
|---------------------------|-------|--------------|---------------|----------------------------------|------|------|------|------|------|-----------------------------|---------|-----------------------------|
|                           |       |              |               |                                  |      |      |      |      |      | Number genotyped            |         | Number sequenced for D loop |
|                           |       |              |               | 1991/3*                          | 2004 | 2011 | 2012 | 2013 | 2014 | 12 loci only                | 18 loci |                             |
| Punta Carola              | SRCA  | 0°53'22.01"S | 89°36'45.04"W |                                  |      |      |      | 15   |      |                             | 13      | 10                          |
| La Loberia                | SRL   | 0°55'19.80"S | 89°37'15.04"W | 31                               | 39   |      | 30   | 40   | 27   | 35                          | 111     | 133                         |
| Playa Ochoa               | SRO   | 0°51'50.04"S | 89°34'16.06"W |                                  |      |      | 6    | 1    |      |                             | 7       | 1                           |
| Isla Lobos                | SRIL  | 0°51'20.04"S | 89°34'5.04"W  |                                  |      |      | 7    | 15   | 15   |                             | 33      | 11                          |
| Cerro Brujo               | SRCB  | 0°45'50.10"S | 89°27'31.20"W |                                  |      |      | 6    | 19   | 3    |                             | 14      | 5                           |
| Bahía Sardina             | SRBS  | 0°42'11.90"S | 89°21'52.30"W |                                  |      |      | 1    | 1    |      |                             | 2       | 1                           |
| La Galapaguera            | SRG   | 0°41'34.90"S | 89°18'10.90"W |                                  |      |      | 20   | 35   | 8    |                             | 66      | 42                          |
| Las Salinas               | SRS   | 0°41'50.09"S | 89°16'15.01"W |                                  |      |      | 20   | 21   | 1    |                             | 42      | 21                          |
| Playa Blanca              | SRPB  | 0°41'42.04"S | 89°15'27.08"W | 22                               |      | 13   | 15   | 50   | 10   |                             | 78      | 72                          |
| Islote Pitt               | SRIP  | 0°42'11.01"S | 89°14'50.01"W |                                  |      | 6    | 10   | 10   | 10   |                             | 36      | 9                           |
| Playa Café                | SRPC  | 0°42'51.04"S | 89°14'30.09"W |                                  |      | 5    | 15   | 22   | 22   |                             | 87      | 29                          |
| Puerto Chino (East coast) | SRCH  | 0°55'32.52"S | 89°25'33.10"W |                                  |      |      |      | 1    |      |                             | 1       | 1                           |
| East coast A              | SRECA | 0°51'20.60"S | 89°21'55.20"W |                                  |      |      |      |      | 8    |                             | 8       | 8                           |
| East coast B              | SRECB | 0°47'9.50"S  | 89°17'53.00"W |                                  |      |      |      |      | 5    |                             | 5       | 5                           |
| East coast C              | SRECC | 0°45'43.40"S | 89°16'38.70"W |                                  |      |      |      |      | 2    |                             | 2       | 2                           |
| East coast D              | SRECD | 0°44'55.10"S | 89°16'5.30"W  |                                  |      |      |      |      | 6    |                             | 6       | 6                           |
| East coast E              | SRECE | 0°43'44.90"S | 89°15'3.60"W  |                                  |      |      |      |      | 2    |                             | 2       | 2                           |
| Total counts              |       |              |               | 53                               | 52   | 24   | 130  | 230  | 119  | 35                          | 513     | 369                         |

**Table S2.** Locations and number of marine iguana blood samples collected from across the Galapagos archipelago utilised in the various molecular datasets (A-H) used throughout the study.

| Island                         | Sample size per dataset |    |      |     |     |    |   |    |
|--------------------------------|-------------------------|----|------|-----|-----|----|---|----|
|                                | A                       | B  | C    | D   | E   | F  | G | H  |
| Darwin                         |                         |    | 3    |     |     | 1  |   | 1  |
| Rocca Redonda                  |                         |    | 9    |     |     | 1  |   | 1  |
| Wolf                           |                         |    | 12   |     |     | 2  |   | 2  |
| Fernandina                     |                         |    | 179  | 50  |     | 2  | 1 | 2  |
| Isabela                        | 1                       | 5  | 138  | 50  |     | 2  |   | 2  |
| Pinzon                         |                         |    | 12   |     |     |    |   |    |
| Rabida                         |                         |    | 11   |     |     |    |   |    |
| Pinta                          |                         |    | 93   | 50  |     | 2  |   | 2  |
| Marchena                       |                         |    | 78   | 50  |     | 2  |   | 2  |
| Genovesa                       |                         |    | 81   | 50  |     | 2  |   | 2  |
| Santiago                       |                         |    | 72   | 47  |     | 2  |   | 2  |
| Santa Cruz                     |                         | 5  | 116  | 50  |     | 2  |   | 2  |
| Seymour Norte                  |                         |    | 10   |     |     |    |   |    |
| Santa Fé                       |                         |    | 159  | 50  |     | 2  |   | 2  |
| Floreana                       |                         |    | 60   | 50  |     | 2  |   | 2  |
| Española                       |                         |    | 98   | 43  |     | 2  |   | 2  |
| San Cristóbal: Loberia         | 1                       | 5  | 166  | 50  | 157 | 4  | 1 | 4  |
| San Cristóbal: Punta Pitt      | 1                       | 5  | 171  | 50  | 306 | 5  | 1 | 5  |
| San Cristóbal: East coast      |                         |    | 23   | 24  | 11  |    |   |    |
| <i>Conolophus subcristatus</i> | 1                       | 4  |      |     |     | 2  |   |    |
| <i>Conolophus pallidus</i>     |                         | 1  |      |     |     | 2  | 1 |    |
| <i>Conolophus marthae</i>      |                         |    |      |     |     |    |   |    |
| <i>Ctenosaura similis</i>      | 1                       |    |      |     |     | 2  |   |    |
| <i>Ctenosaura pectinata</i>    |                         | 1  |      |     |     |    |   |    |
| <i>Iguana iguana</i>           | 1                       | 1  |      |     |     |    |   |    |
| Other squamate species         | 73                      |    |      |     |     | 2  |   |    |
| Total: <i>A. cristatus</i>     | 3                       | 20 | 1491 | 614 | 474 | 33 | 3 | 33 |
| Total: all                     | 79                      | 27 | 1491 | 614 | 474 | 41 | 4 | 33 |

**Table S3.** List of putative hybrids and migrants identified on Santa Cruz Island. D-loop haplotype numbers are as in a previous study (S11) and used in Fig. 2. Assignment tests were carried out with GENECLASS.

| Loc. type  | Individual and gender/size | Size Class | D loop hap # | Island(s) associated with haplotype | Microsat. assignment | probability of assignment | Conclusion                                                                          | Weight | TL  | SVL |
|------------|----------------------------|------------|--------------|-------------------------------------|----------------------|---------------------------|-------------------------------------------------------------------------------------|--------|-----|-----|
| East coast | SRECA_01                   | M4         | 4            | Española                            | Santa Cruz           | 62                        | Inconclusive, possible hybrid: East coast population (Española origin) / Santa Cruz | 4.6    | 117 | 45  |
|            | SRECA_02                   | F4         | 4            | Española                            | Floreana/Española    | 96                        | Pure East coast population of Española origin                                       | 2.35   | 97  | 38  |
|            | SRECA_03                   | M4         | 4            | Española                            | Floreana/ Española   | 100                       | Pure East coast population of Española origin                                       | 4.08   | 105 | 41  |
|            | SRECA_04                   | U2         | 4            | Española                            | Floreana/ Española   | 100                       | Pure East coast population of Española origin                                       | 0.57   | 47  | 18  |
|            | SRECA_05                   | U2         | 6            | Española                            | Floreana/ Española   | 100                       | Pure East coast population of Española origin                                       | 0.62   | 58  | 26  |
|            | SRECA_06                   | U2         | 4            | Española                            | Punta Pitt           | 76                        | Hybrid: Punta Pitt/East coast population (Española origin)                          | 0.68   | 55  | 21  |
|            | SRECA_07                   | M4         | 6            | Española                            | Floreana/ Española   | 100                       | Pure Española (EC pop)                                                              | 5.65   | 123 | 52  |
|            | SRECA_08                   | M4         | 4            | Española                            | Loberia              | 100                       | Hybrid: Loberia / East coast population (Española origin)                           | 6.46   | 123 | 50  |
|            | SRECB_03                   | M4         | 3            | Española                            | Punta Pitt           | 100                       | Hybrid: Punta Pitt / East coast population (Española origin)                        | 4.2    | 106 | 37  |
|            | SRECB_0                    | F4         | 3            | Española                            | Punta Pitt           | 99                        | Hybrid: Punta Pitt / East coast population (Española origin)                        | 2.39   | 81  | 32  |
|            | SRECC_01                   | F4         | 3            | Española                            | Punta Pitt           | 100                       | Hybrid: Punta Pitt / East coast population (Española origin)                        | 17.3   | 71  | 26  |
| Punta Pitt | SRG12_06                   | M4         | unavailable  |                                     | Floreana/ Española   | 63                        | Inconclusive. Probable genotype signatures of Española origin                       | 3.6    | 95  | 35  |
|            | SRG13_08                   | M4         | 67           | Santa Cruz                          | Floreana/ Española   | 76                        | Inconclusive, possible hybrid: East coast population (Española origin) / Santa Cruz | 5.2    | 108 | 40  |
|            | SRG13_11                   | F4         | 81           | San Cristóbal: Punta Pitt           | Loberia              | 61                        | Hybrid: Loberia/Punta Pitt                                                          | 1.58   | 69  | 26  |
|            | SRG13_34                   | M4         | 67           | Santa Cruz                          | Santa Cruz           | 83                        | Santa Cruz vagrant                                                                  | 3.04   | 91  | 34  |
|            | SRS13_05                   | M3         | 81           | San Cristóbal: Punta Pitt           | Loberia              | 90                        | Hybrid: Loberia/Punta Pitt                                                          | 0.72   | 57  | 21  |
| Loberia    | SRL13_22                   | M3         | 67           | Santa Cruz                          | Santa Cruz           | 100                       | Santa Cruz vagrant                                                                  | 2.2    | 81  | 31  |
|            | SRL13_24                   | M4         | 20           | Santiago, Santa Fe                  | Santa Cruz           | 100                       | Probable Santa Cruz vagrant                                                         | 5.12   | 108 | 40  |
|            | SRL14_02                   | F4         | unavailable  |                                     | Santa Cruz           | 100                       | Probable Santa Cruz vagrant                                                         | 2.62   | 36  | 90  |
|            | SRIL13_06                  | M4         | 68           | San Cristóbal: Loberia              | Santa Cruz           | 89                        | Hybrid: Loberia/Santa Cruz                                                          | 1.76   | 78  | 33  |

**Table S4.** Results from the Bottleneck Analysis. P-values for the standardized difference and Wilcoxon tests are shown. In bold is the non-significant p-value after Bonferroni correction.

| Test                         | Loberia      | Punta Pitt |
|------------------------------|--------------|------------|
| Standardized Difference test | <b>0.049</b> | 0.0009     |
| Wilcoxon test                | 0.017        | 0.0002     |

**Table S5.** Prior distributions for the MsVar analysis. Each row in the table shows the prior distribution of the parameters of the MsVar analysis for each of the seven scenarios tested. The parameters are  $N_0$ = Current Effective Population Size,  $N_t$ = Ancestral Effective Population Size,  $u$ = mutation rate,  $t$ = time at which the change in effective population size took place. The value under each parameter is the log mean of the distribution and under the column parameter Var is the variance of the distribution as used in MsVar. The variance of the means and of the variances in the hyperpriors of all parameters were in all simulations 0 and 0.5, respectively. Each of these seven models were tested in each population.

| Scenario | $N_0$ | $N_0$ Var | $N_t$ | $N_t$ Var | $u$ | $u$ Var | $t$ | $t$ Var |
|----------|-------|-----------|-------|-----------|-----|---------|-----|---------|
| 1        | 4     | 2         | 4     | 2         | -4  | 1       | 5   | 2       |
| 2        | 5     | 2         | 5     | 2         | -4  | 2       | 6   | 2       |
| 3        | 5     | 2         | 3     | 2         | -4  | 2       | 5   | 1       |
| 4        | 4     | 1         | 5     | 1         | -4  | 1       | 5   | 2       |
| 5        | 3     | 1         | 5     | 1         | -4  | 1       | 6   | 1       |
| 6        | 3     | 2         | 5     | 3         | -4  | 3       | 5   | 3       |
| 7        | 4     | 1         | 5     | 1         | -4  | 1       | 3   | 2       |

**Table S6.** Posterior distribution from the MsVar analysis. Data are given as log10.

|    | $N_0$  | HPD 95%      |
|----|--------|--------------|
| LO | 1000   | 96–2139      |
| PP | 1039   | 282–3236     |
|    | NA     | HPD 95% LB   |
| LO | 141254 | 44868–568351 |
| PP | 100000 | 32643–386843 |
|    | $t$    | HPD 95% LB   |
| LO | 1848   | 178–3561     |
| PP | 3043   | 857–9755     |

**Table S7.** Genetic (below diagonal, in  $R_{ST}$  values) and geographic (above diagonal, in km) distances between localities included in the Isolation by Distance analysis of the LO cluster. Locality codes as presented in Fig. 3.

|      | SRL   | SRPA  | SRO   | SRIL  | SRCB  |
|------|-------|-------|-------|-------|-------|
| SRL  |       | 6.5   | 13.41 | 15.02 | 41.52 |
| SRPA | 0.020 |       | 6.91  | 8.52  | 35.02 |
| SRO  | 0.020 | 0.021 |       | 1.61  | 28.11 |
| SRIL | 0.036 | 0.007 | 0.004 |       | 26.5  |
| SRCB | 0.062 | 0.051 | 0.033 | 0.043 |       |

**Table S8.** Genetic (below diagonal, in  $R_{ST}$  values) and geographic (above diagonal, in km) distances between localities included in the IBD analysis of the PP cluster. Locality codes as presented in Fig. 3.

|       | SRBS | SRG  | SRS   | SRPB  | SRIP  | SRPC  | SRECD | SRECC |
|-------|------|------|-------|-------|-------|-------|-------|-------|
| SRBS  |      | 10.5 | 15.53 | 17.33 | 19.41 | 21.43 | 26.8  | 30.88 |
| SRG   | 0.00 |      | 5.03  | 6.83  | 8.91  | 10.93 | 16.3  | 20.38 |
| SRS   | 0.02 | 0.01 |       | 1.8   | 3.88  | 5.9   | 11.27 | 15.35 |
| SRPB  | 0.01 | 0.01 | 0.00  |       | 2.08  | 4.1   | 9.47  | 13.55 |
| SRIP  | 0.08 | 0.03 | 0.02  | 0.02  |       | 3.05  | 8.42  | 12.5  |
| SRPC  | 0.00 | 0.01 | 0.01  | 0.01  | 0.03  |       | 5.37  | 9.45  |
| SRECD | 0.00 | 0.01 | 0.02  | 0.01  | 0.03  | 0.00  |       | 4.08  |
| SRECC | 0.01 | 0.05 | 0.05  | 0.06  | 0.05  | 0.02  | 0.00  |       |

**Table S9.** Results of Mann-Whitney U-tests for SVL and scale counts, based on the pooled dataset of all age classes and sexes. Note that variables in the second part of the tables were only assessed in a limited number of specimens (see Valid N columns). Group 1 refers to specimens genetically assigned to LO and Group 2 to PP. Hybrids were not considered in the analysis. Asterisks mark variables with significant differences between PP and LO. Note that under Bonferroni correction only p values <0.0032 would remain significant at the 0.05 level, i.e., only INFL, INFINFL, and DORSCL.

|          | Rank Sum Group 1 | Rank Sum Group 2 | U        | Z        | p-level  | Z adjusted | p-level  | Valid N Group 1 | Valid N Group 2 | 2*1sided exact p |
|----------|------------------|------------------|----------|----------|----------|------------|----------|-----------------|-----------------|------------------|
| *SVL     | 5550.000         | 4180.000         | 1902.000 | 2.14978  | 0.031574 | 2.15168    | 0.031423 | 72              | 67              | 0.031437         |
| *LAM3T   | 3418.000         | 3603.000         | 1338.000 | -2.10666 | 0.035148 | -2.12153   | 0.033878 | 64              | 54              | 0.035039         |
| *LAM4T   | 3089.500         | 3465.500         | 1259.500 | -2.04585 | 0.040772 | -2.05537   | 0.039844 | 60              | 54              | 0.040449         |
| SUPL     | 3915.500         | 3959.500         | 1569.500 | -1.82663 | 0.067756 | -1.88981   | 0.058784 | 68              | 57              | 0.067641         |
| *SUPSUPL | 3905.500         | 3969.500         | 1490.500 | -2.19188 | 0.028389 | -2.20484   | 0.027466 | 69              | 56              | 0.028033         |
| *INFL    | 3591.500         | 3911.500         | 1245.500 | -3.04373 | 0.002337 | -3.10726   | 0.001888 | 68              | 54              | 0.002149         |
| *INFINFL | 2820.000         | 3508.000         | 929.000  | -3.66035 | 0.000252 | -3.68227   | 0.000231 | 61              | 51              | 0.000205         |
| *DORSCL  | 1602.500         | 2957.500         | 699.500  | -3.09862 | 0.001944 | -3.14417   | 0.001666 | 42              | 53              | 0.001726         |
| TRHSC    | 97.000           | 113.000          | 47.000   | 0.18993  | 0.849361 | 0.19506    | 0.845345 | 9               | 11              | 0.881984         |
| LOHSC    | 157.000          | 143.000          | 52.000   | 1.12976  | 0.258577 | 1.17702    | 0.239186 | 11              | 13              | 0.276668         |
| EYELUI   | 36.000           | 100.000          | 22.000   | 0.24254  | 0.808365 | 0.24470    | 0.806685 | 4               | 12              | 0.861538         |
| EYELLI   | 158.000          | 248.000          | 67.000   | -1.40499 | 0.160024 | -1.41707   | 0.156464 | 13              | 15              | 0.169623         |
| *EYELUO  | 227.000          | 179.000          | 43.000   | 2.46046  | 0.013876 | 2.47576    | 0.013296 | 12              | 16              | 0.013016         |
| EYLLO    | 230.500          | 234.500          | 63.500   | 1.88384  | 0.059588 | 1.89997    | 0.057439 | 12              | 18              | 0.058779         |
| FP       | 104.000          | 247.000          | 68.000   | -0.22222 | 0.824141 | -0.22283   | 0.823666 | 8               | 18              | 0.849089         |
| HCSP     | 85.500           | 145.500          | 40.500   | -0.95940 | 0.337356 | -0.98065   | 0.326767 | 9               | 12              | 0.345103         |



**Table S10.** ANOVA results of test including 8 variables and all age classes and all sexes. Asterisks mark variables with significant differences between PP and LO.

|           | <b>Test</b> | <b>Value</b> | <b>F</b> | <b>Effect df</b> | <b>Error df</b> | <b>p</b> |
|-----------|-------------|--------------|----------|------------------|-----------------|----------|
| Intercept | Wilks       | 0.002862     | 2395.123 | 8                | 55              | 0.000000 |
| SPNR      | Wilks       | 0.663590     | 3.485    | 8                | 55              | 0.002547 |

  

| <b>Tukey's Post hoc test:</b> |          |  |          |          |  |  |
|-------------------------------|----------|--|----------|----------|--|--|
| *SVL                          | 0.042853 |  | SUPSUPL  | 0.113464 |  |  |
| LAM3T                         | 0.104814 |  | *INFL    | 0.022578 |  |  |
| LAM4T                         | 0.090530 |  | *INFINFL | 0.002007 |  |  |
| SUPL                          | 0.063207 |  | *DORSC1  | 0.000460 |  |  |

**Table S11.** Results of Mann-Whitney U-tests for SVL and scale counts, based on males in age class 4 only. Group 1 refers to specimens genetically assigned to LO and Group 2 to PP. Hybrids were not considered in the analysis. Asterisks mark variables with significant differences between PP and LO.

|         | <b>Rank Sum Group 1</b> | <b>Rank Sum Group 2</b> | <b>U</b> | <b>Z</b> | <b>p-level</b> | <b>Z adjusted</b> | <b>p-level</b> | <b>Valid N Group 1</b> | <b>Valid N Group 2</b> | <b>2*1sided exact p</b> |
|---------|-------------------------|-------------------------|----------|----------|----------------|-------------------|----------------|------------------------|------------------------|-------------------------|
| *SVL    | 1589.500                | 688.5000                | 282.5000 | 3.34970  | 0.000809       | 3.36051           | 0.000778       | 39                     | 28                     | 0.000623                |
| LAM3T   | 999.000                 | 597.0000                | 366.0000 | 0.02539  | 0.979747       | 0.02555           | 0.979619       | 35                     | 21                     | 0.986616                |
| LAM4T   | 944.000                 | 709.0000                | 278.0000 | -1.65431 | 0.098066       | -1.65929          | 0.097059       | 36                     | 21                     | 0.100053                |
| SUPL    | 1212.500                | 678.5000                | 378.5000 | 0.96701  | 0.333541       | 1.02850           | 0.303717       | 37                     | 24                     | 0.336203                |
| SUPSUP  | 1069.000                | 822.0000                | 328.0000 | -1.62205 | 0.104793       | -1.63600          | 0.101841       | 38                     | 23                     | 0.106775                |
| INFL    | 1052.000                | 718.0000                | 349.0000 | -0.90914 | 0.363277       | -0.94115          | 0.346630       | 37                     | 22                     | 0.370393                |
| INFINF  | 950.000                 | 646.0000                | 284.0000 | -1.29957 | 0.193748       | -1.30751          | 0.191042       | 36                     | 20                     | 0.198540                |
| *DORSC1 | 281.500                 | 498.5000                | 110.5000 | -2.21149 | 0.027003       | -2.31631          | 0.020542       | 18                     | 21                     | 0.025801                |

**Table S12.** ANOVA results of test including 8 variables and males of age class 4 only. Asterisks mark variables with significant differences between PP and LO.

|           | <b>Test</b> | <b>Value</b> | <b>F</b> | <b>Effect df</b> | <b>Error df</b> | <b>p</b> |
|-----------|-------------|--------------|----------|------------------|-----------------|----------|
| Intercept | Wilks       | 0.001500     | 1414.137 | 8                | 17              | 0.000000 |
| SPNR      | Wilks       | 0.382688     | 3.428    | 8                | 17              | 0.015616 |

  

| <b>Tukey's Post hoc test:</b> |          |  |         |          |  |  |
|-------------------------------|----------|--|---------|----------|--|--|
| *SVL                          | 0.005099 |  | SUPSUPL | 0.503060 |  |  |
| LAM3T                         | 0.506114 |  | INFL    | 0.284878 |  |  |
| LAM4T                         | 0.298264 |  | INFINFL | 0.223681 |  |  |
| SUPL                          | 0.968222 |  | *DORSC1 | 0.039254 |  |  |

**Table S13.** Results of Mann-Whitney U-tests for SVL and scale counts, based on females in age class 4 only. Group 1 refers to specimens genetically assigned to LO and Group 2 to PP. Hybrids were not considered in the analysis. Asterisks mark variables with significant differences between PP and LO. Note that under Bonferroni correction only p values <0.0063 would remain significant at the 0.05 level, i.e., none of the variables would show significant differences.

|         | Rank Sum<br>Group 1 | Rank Sum<br>Group 2 | U        | Z        | p-level  | Z<br>adjusted | p-level  | Valid N<br>Group 1 | Valid N<br>Group 2 | 2*1sided<br>exact p |
|---------|---------------------|---------------------|----------|----------|----------|---------------|----------|--------------------|--------------------|---------------------|
| *SVL    | 95.50000            | 204.5000            | 14.50000 | 2.34570  | 0.018992 | 2.35752       | 0.018398 | 5                  | 19                 | 0.015246            |
| LAM3T   | 44.50000            | 231.5000            | 29.50000 | -1.15530 | 0.247968 | -1.18773      | 0.234942 | 5                  | 18                 | 0.257066            |
| LAM4T   | 47.00000            | 206.0000            | 32.00000 | -0.82263 | 0.410717 | -0.83644      | 0.402906 | 5                  | 17                 | 0.445584            |
| SUPL    | 52.00000            | 179.0000            | 37.00000 | -0.24772 | 0.804354 | -0.25407      | 0.799445 | 5                  | 16                 | 0.841712            |
| SUPSUP  | 56.50000            | 174.5000            | 38.50000 | 0.12386  | 0.901427 | 0.12496       | 0.900556 | 5                  | 16                 | 0.904713            |
| INFL    | 34.50000            | 175.5000            | 19.50000 | -1.57117 | 0.116144 | -1.61103      | 0.107174 | 5                  | 15                 | 0.118550            |
| INFINF  | 35.00000            | 155.0000            | 25.00000 | -0.50000 | 0.617075 | -0.50310      | 0.614895 | 4                  | 15                 | 0.664603            |
| *DORSC1 | 25.00000            | 206.0000            | 10.00000 | -2.47717 | 0.013243 | -2.50083      | 0.012391 | 5                  | 16                 | 0.011106            |

**Table S14.** ANOVA results of test including 8 variables and females of age class 4 only. Asterisks mark variables with significant differences between PP and LO.

|           | Test  | Value    | F        | Effect df | Error df | p        |
|-----------|-------|----------|----------|-----------|----------|----------|
| Intercept | Wilks | 0.000355 | 2464.067 | 8         | 7        | 0.000000 |
| SPNR      | Wilks | 0.405860 | 1.281    | 8         | 7        | 0.378523 |

**Tukey's Post hoc test:**

|       |          |         |          |
|-------|----------|---------|----------|
| *SVL  | 0.016457 | SUPSUP  | 0.962186 |
| LAM3T | 0.194163 | INFL    | 0.380532 |
| LAM4T | 0.479982 | INFINFL | 0.469247 |
| SUPL  | 0.855120 | DORSC1  | 0.096383 |

**Table S15.** Results of Mann-Whitney U-tests for residuals (after regression against SVL) of four morphometric measurements, based on all age classes and both sexes. Group 1 refers to specimens genetically assigned to LO and Group 2 to PP. Asterisks mark variables with significant differences between PP and LO. Hybrids were not considered in the analysis.

| Residue | Rank Sum<br>Group 1 | Rank Sum<br>Group 2 | U        | Z        | p-level  | Z<br>adjusted | p-level  | Valid N<br>Group 1 | Valid N<br>Group 2 | 2*1sided<br>exact p |
|---------|---------------------|---------------------|----------|----------|----------|---------------|----------|--------------------|--------------------|---------------------|
| *HW     | 3997.500            | 3628.500            | 1417.500 | 2.35082  | 0.018732 | 2.35085       | 0.018731 | 57                 | 66                 | 0.018357            |
| *HL     | 2853.000            | 4773.000            | 1200.000 | -3.45396 | 0.000552 | -3.45398      | 0.000552 | 57                 | 66                 | 0.000480            |
| HH      | 3771.000            | 3855.000            | 1644.000 | 1.20204  | 0.229349 | 1.20206       | 0.229342 | 57                 | 66                 | 0.231237            |
| *TOEL   | 3069.500            | 4556.500            | 1416.500 | -2.35590 | 0.018479 | -2.35591      | 0.018478 | 57                 | 66                 | 0.018103            |

**Table S16.** ANOVA results for four morphometric measurements, based on all age classes and both sexes. Asterisks mark variables with significant differences between PP and LO.

|                               | Test     | Value    | F        | Effect df | Error df | p        |
|-------------------------------|----------|----------|----------|-----------|----------|----------|
| Intercept                     | Wilks    | 0.996937 | 0.090650 | 4         | 118      | 0.985233 |
| SPNR                          | Wilks    | 0.808862 | 6.971001 | 4         | 118      | 0.000045 |
| <b>Tukey's Post hoc test:</b> |          |          |          |           |          |          |
| *HW                           | 0.040320 |          | HH       | 0.332132  |          |          |
| *HL                           | 0.002088 |          | *TOEL    | 0.009745  |          |          |

**Table S17.** Results of Mann-Whitney U-tests for residuals (after regression against SVL) of four morphometric measurements, based on all age classes and both sexes, but excluding all specimens <20 mm and >36 mm. Group 1 refers to specimens genetically assigned to LO and Group 2 to PP. Hybrids were not considered in the analysis. Asterisks mark variables with significant differences between PP and LO.

| Residue | Rank Sum Group 1 | Rank Sum Group 2 | U        | Z        | p-level  | Z adjusted | p-level  | Valid N Group 1 | Valid N Group 2 | 2*1sided exact p |
|---------|------------------|------------------|----------|----------|----------|------------|----------|-----------------|-----------------|------------------|
| HW      | 1204.500         | 2116.500         | 631.5000 | 0.97681  | 0.328665 | 0.97684    | 0.328648 | 27              | 54              | 0.330836         |
| *HL     | 831.000          | 2490.000         | 453.0000 | -2.76512 | 0.005691 | -2.76517   | 0.005690 | 27              | 54              | 0.005277         |
| HH      | 1076.500         | 2244.500         | 698.5000 | -0.30557 | 0.759935 | -0.30558   | 0.759926 | 27              | 54              | 0.761407         |
| TOEL    | 920.500          | 2400.500         | 542.5000 | -1.86846 | 0.061699 | -1.86851   | 0.061692 | 27              | 54              | 0.061413         |

**Table S18.** ANOVA results for four morphometric measurements, based on all age classes and both sexes, but excluding all specimens <20 mm and >36 mm. Asterisks mark variables with significant differences between PP and LO.

|                               | Test     | Value    | F        | Effect df | Error df | p        |
|-------------------------------|----------|----------|----------|-----------|----------|----------|
| Intercept                     | Wilks    | 0.996937 | 0.090650 | 4         | 118      | 0.985233 |
| SPNR                          | Wilks    | 0.808862 | 6.971001 | 4         | 118      | 0.000045 |
| <b>Tukey's Post hoc test:</b> |          |          |          |           |          |          |
| HW                            | 0.529953 |          | HH       | 0.757532  |          |          |
| *HL                           | 0.034761 |          | *TOEL    | 0.034362  |          |          |

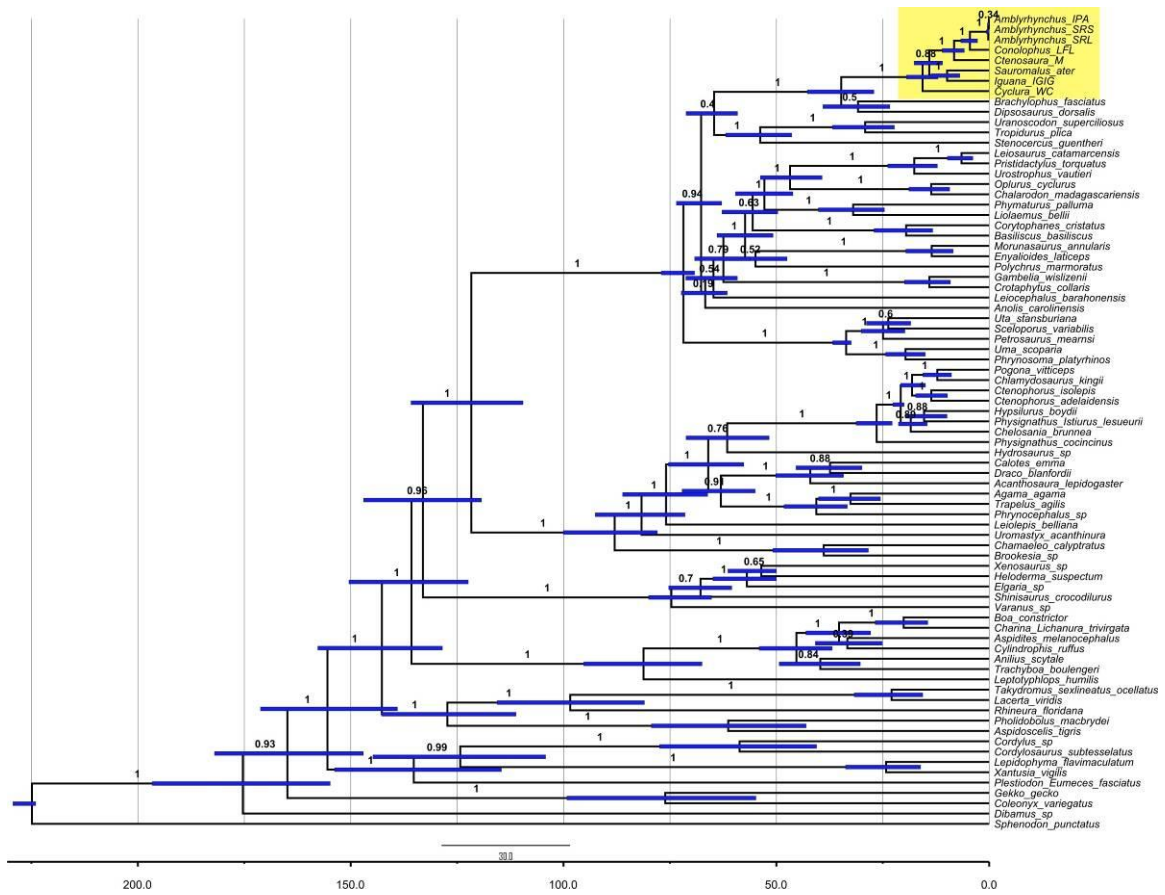

**Figure S1.** Timetree showing iguanine lizards (yellow box) among squamates. Calibrations and settings used are as in a previous study [1]

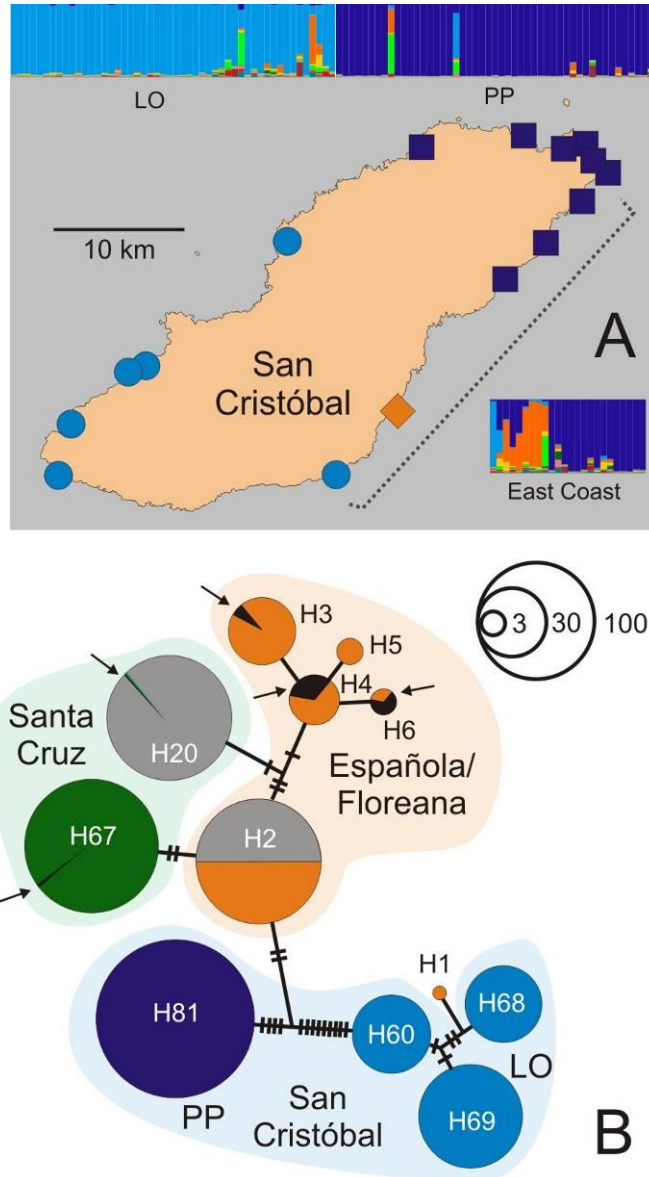

**Figure S2.** (A) Details of Structure assignment (based on 12 microsatellite loci) of specimens from San Cristóbal Island (extracted from Fig. 2 in main paper), showing a low incidence of gene flow between the two island-endemic lineages LO and PP, but several instances of migrants and hybrids from Española and Santa Cruz Islands. (B) Haplotype network of DNA sequences from the mt control region incorporating haplotypes and data from a previous study [11] with newly sequenced samples from San Cristóbal Island (Table S1). Only haplotypes found in iguanas from San Cristóbal are shown, thus the presence of private Española and Santa Cruz haplotypes confirms the presence of migrants from these islands on San Cristóbal, which also is suggested by the microsatellite data. Light grey shows individuals from Española and Santa Cruz, whilst individuals from San Cristóbal with haplotypes typical for Española or Santa Cruz are black and marked with small arrows.

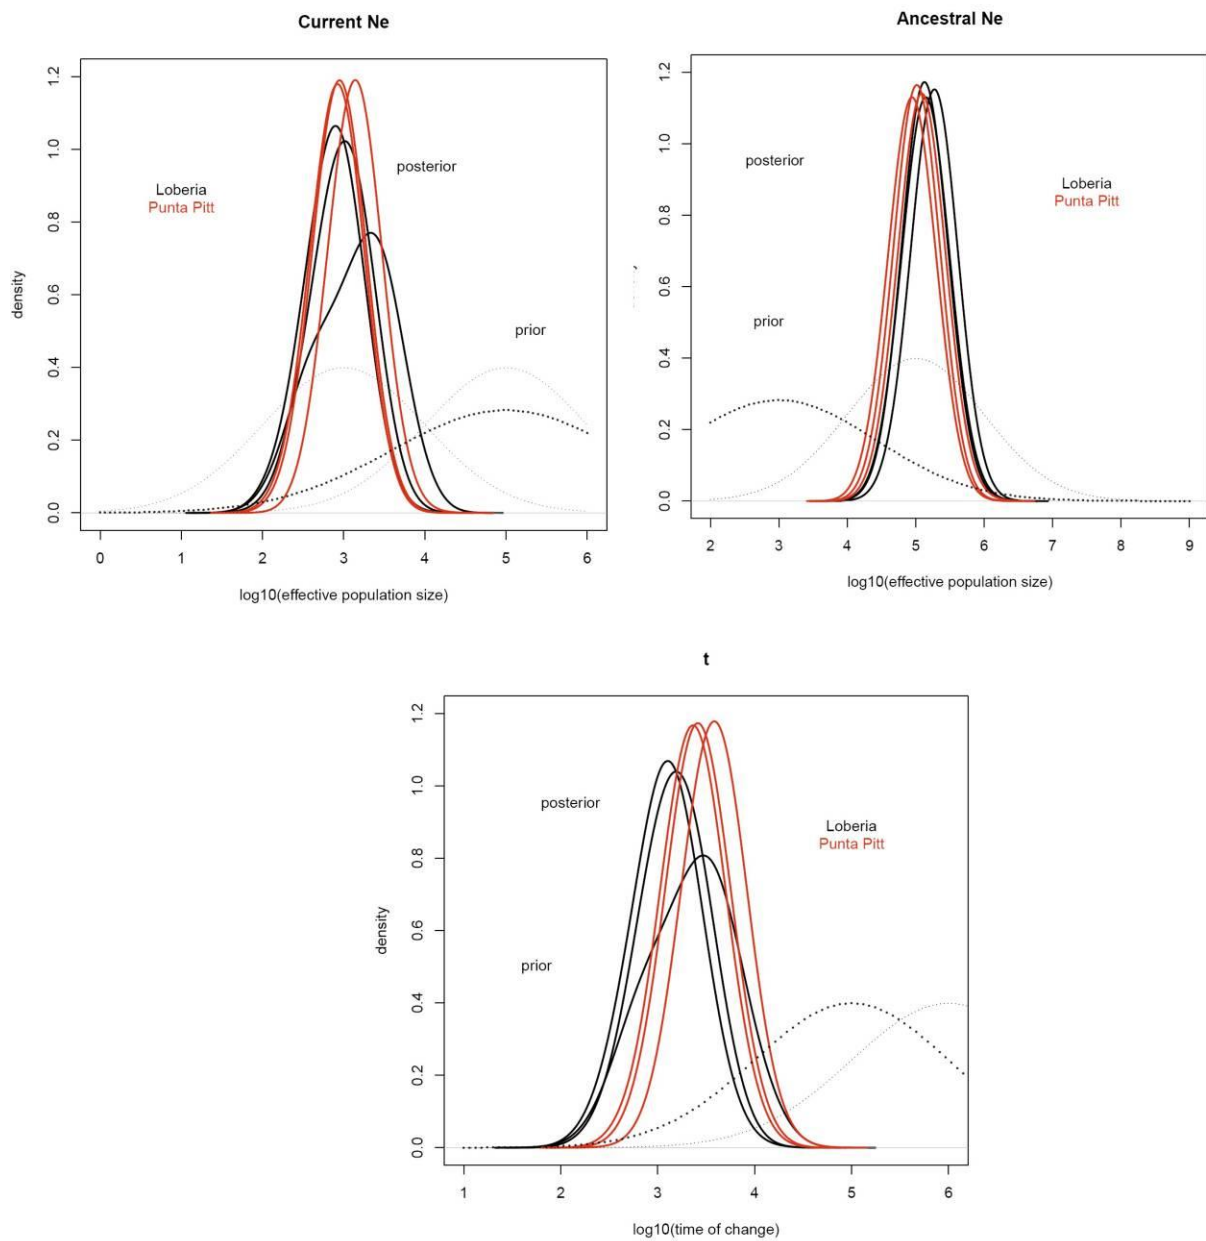

**Figure S3.** Changes from ancestral to current effective population size ( $N_e$ ), and time of inferred change, in PP and LO clusters, based on simulations with MsVar software and based on data from 18 microsatellite loci.

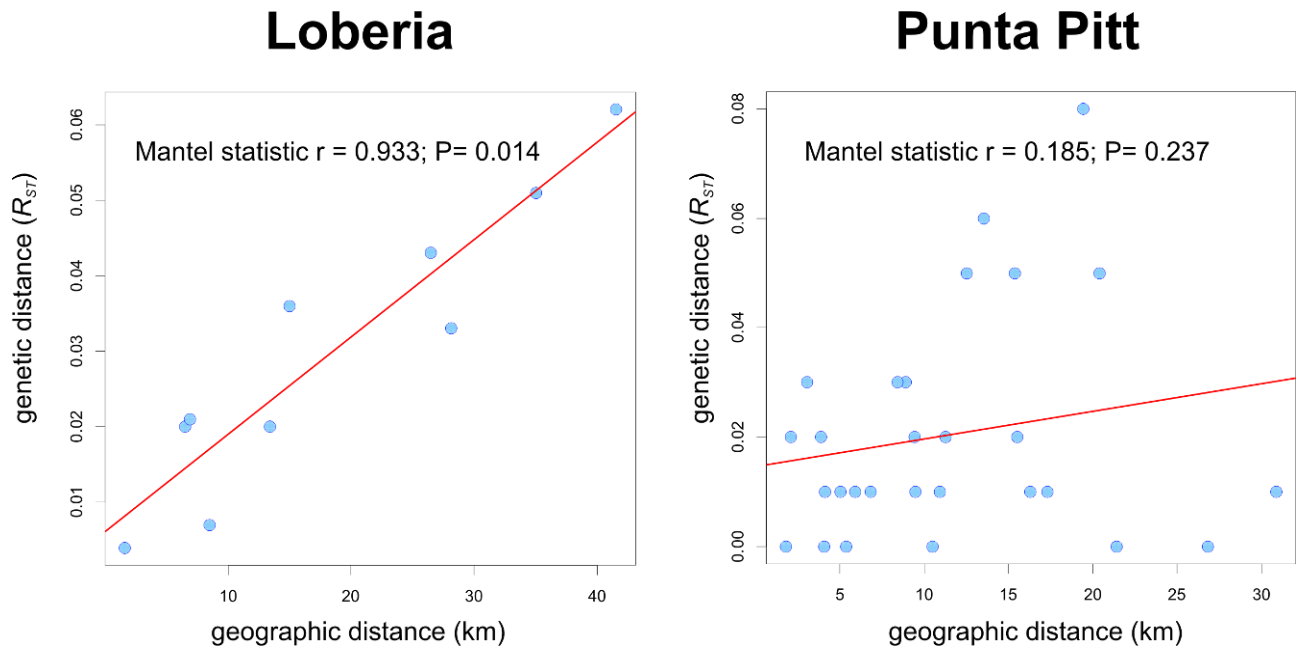

**Figure S4.** Isolation by distance (IBD) analysis for subpopulations of the LO and PP clusters. Significant genetic differentiation between subpopulations is found for the Loberia, but not the Punta Pitt, cluster, indicating a more recent expansion within the PP lineage.

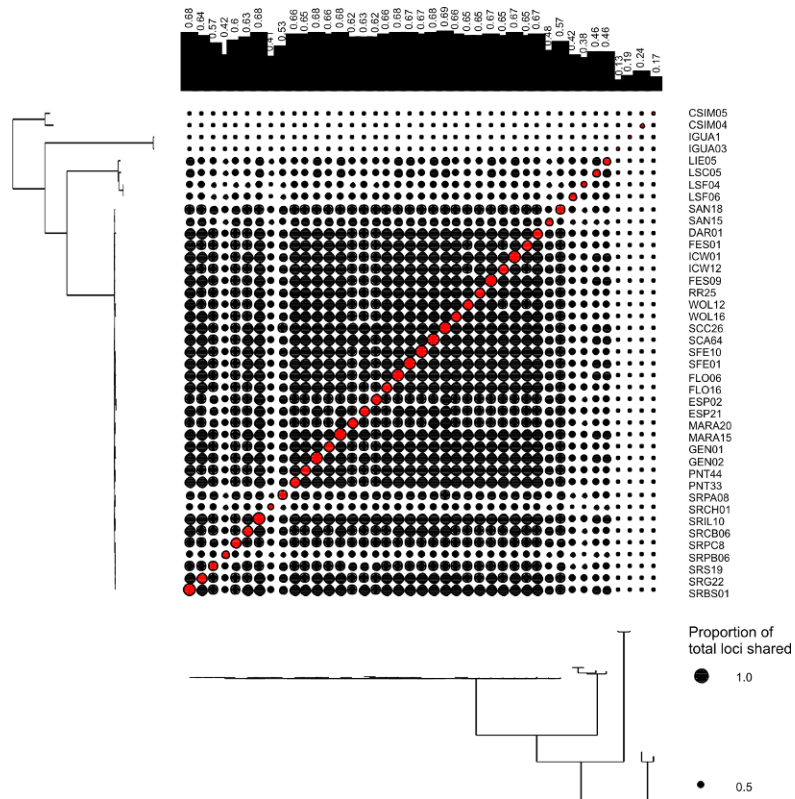

**Figure S5.** Proportion of RAD-Seq derived loci shared among individuals. Loci shared between individuals (black circles, off-diagonal cells) or successfully amplifying within a single individual (red circles along the diagonal) are expressed as the proportion from 0 to 1 of all 60,396 loci scored in this study.



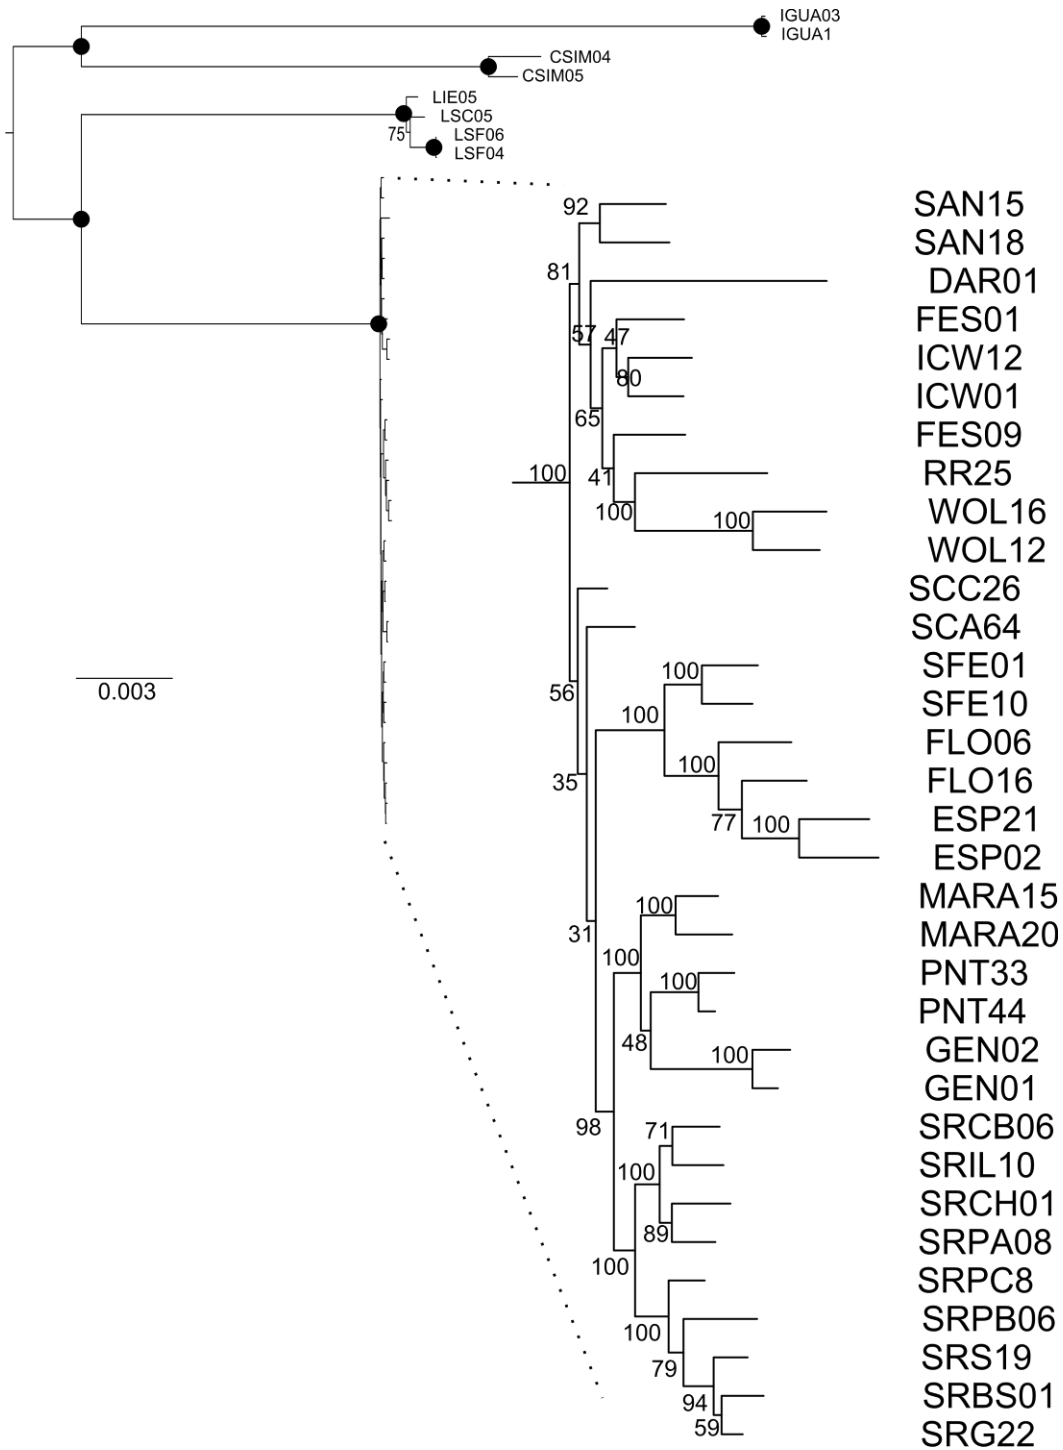

**Figure S6.** Maximum likelihood tree of the sparse matrix of RADSeq-derived DNA sequences. The tree was obtained in RAxML using a GTR +  $\Gamma$  model and an alignment of 5,082,978 bp, branch support was assessed by 100 bootstrap replicates.

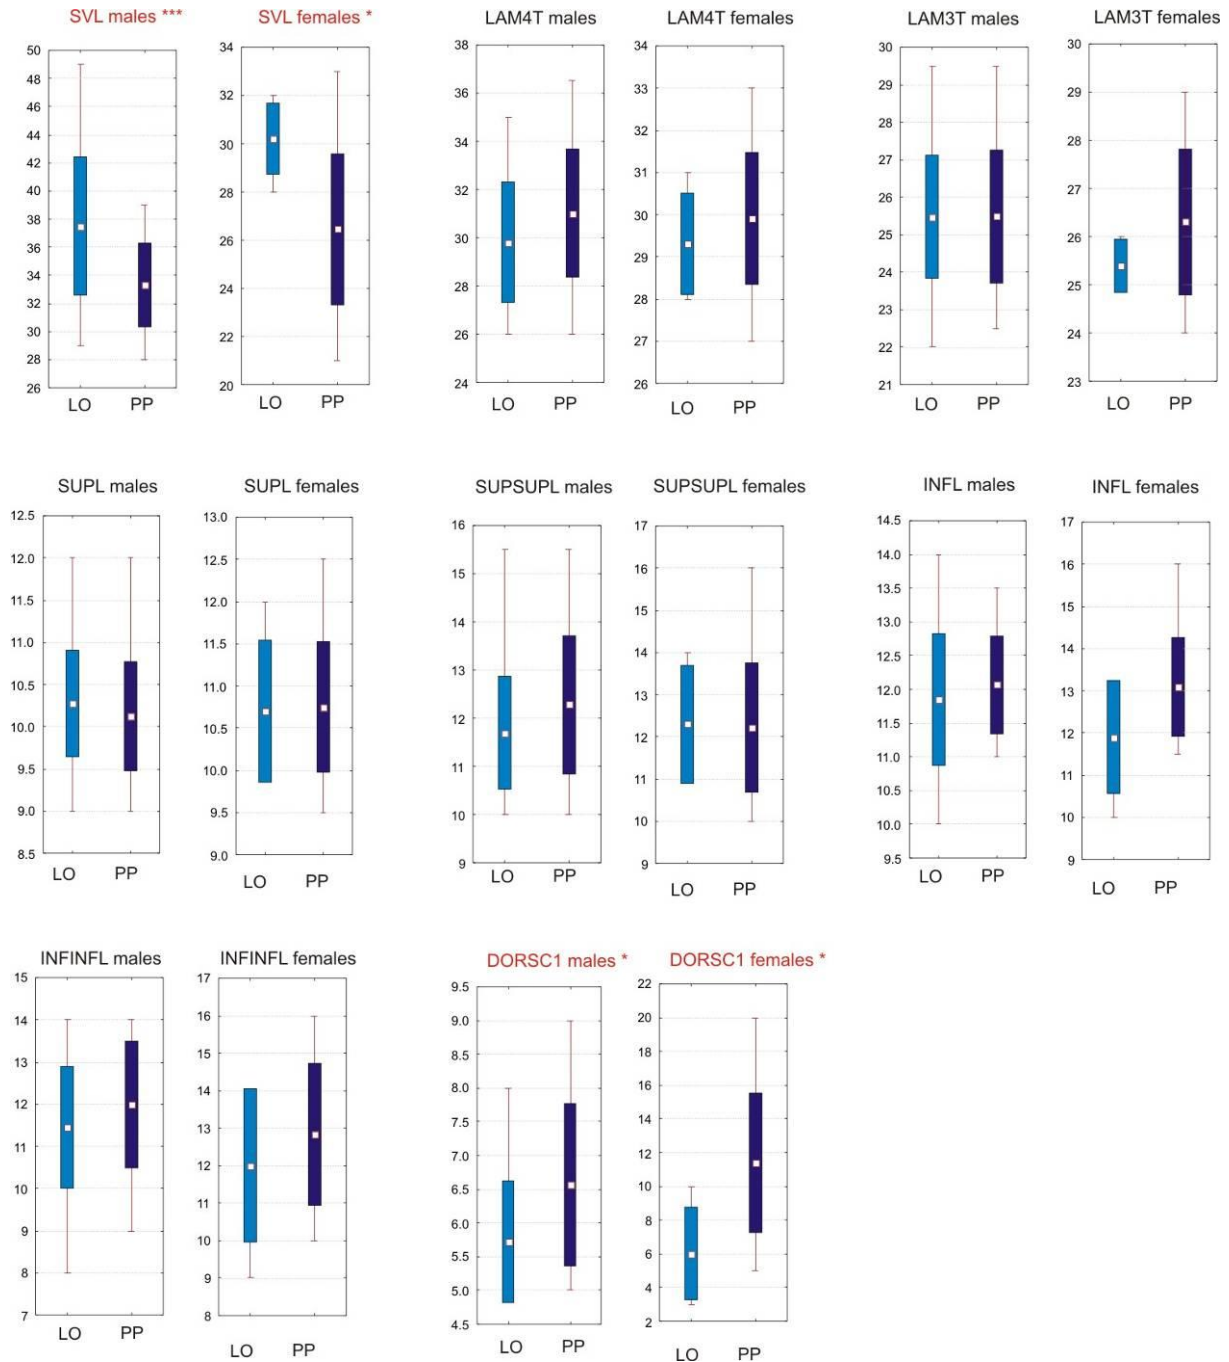

**Figure S7.** Box-Whisker plots comparing specimens of LO and PP iguanas for SVL and 15 scale count variables. All age classes and both sexes included. Asterisks indicate significance in Univariate Mann-Whitney U tests, \*  $P < 0.05$ , \*\*  $P < 0.01$ , \*\*\*  $P < 0.001$ . Note that under Bonferroni correction only p values  $< 0.0063$  would remain significant at the 0.05 level, i.e., none of the variables would show significant differences. See Tables S9-S18 for detailed statistical results.
